# Supplementary material
Source: PubMed Central journal article supplement (PMC4793839)
Supplement: nach015610.w1_default.pdf [file nach015610.w1_default.pdf]

**Table 1** – Characteristics of included trials

| Study Number | Publication Year | Trial Name      |                                          | Mean Age | Follow-up duration (weeks) | Sponsor      | Treatment    | Dose of treatment    | Number of participants randomized | Dosing Regimen | LDL at baseline (mg/dL) |
|--------------|------------------|-----------------|------------------------------------------|----------|----------------------------|--------------|--------------|----------------------|-----------------------------------|----------------|-------------------------|
| 1            | 1988             | LSG-III         | Hypercholesterolemia with or without CHD | 48.7     | 12                         | Industry     | Lovastatin   | 40mg/day             | 87                                | Fixed          | 282.29                  |
|              |                  |                 |                                          | 49.9     |                            |              | Lovastatin   | 80mg/day             | 89                                | Fixed          | 271.08                  |
| 2            | 1993             | PMSG            | Hypercholesterolemia with or without CHD | 55.0     | 26                         | Industry     | Pravastatin  | 20mg/day             | 530                               | Fixed          | 181.36                  |
|              |                  |                 |                                          | 55.0     |                            |              | Control      | NA                   | 532                               |                | 180.20                  |
| 3            | 1993             | SPSG            | Hypercholesterolemia with or without CHD | 52.0     | 24                         | Industry     | Simvastatin  | Started at 10mg/day  | 275                               | Titration*     | 207.00                  |
|              |                  |                 |                                          | 53.0     |                            |              | Pravastatin  | Started at 10mg/day  | 275                               |                | 212.00                  |
| 4            | 1993             | LPSG            | Hypercholesterolemia with or without CHD | 54.0     | 18                         | Industry     | Lovastatin   | 80mg/day             | 339                               | Titration**    | 194.00                  |
|              |                  |                 |                                          | 54.0     |                            |              | Pravastatin  | 40mg/day             | 333                               |                | 196.00                  |
| 5            | 1994             | 4S              | Secondary Prevention                     | 58.6     | 280                        | Industry     | Control      | NA                   | 2193                              | Titration      | 188.32                  |
|              |                  |                 |                                          | 58.6     |                            |              | Simvastatin  | Started at 20mg/day  | 2193                              |                | 188.32                  |
| 6            | 1994             | MAAS            | Secondary Prevention                     | 54.9     | 208                        | Industry     | Placebo      | NA                   | 188                               | Fixed          | 172.85                  |
|              |                  |                 |                                          | 55.6     |                            |              | Simvastatin  | 20mg/day             | 193                               |                | 169.37                  |
| 7            | 1997             | POST-CABG       | Secondary Prevention                     | 61.7     | 52                         | Industry     | Lovastatin   | Started at 40mg/day  | 676                               | Titration      | 156.10                  |
|              |                  |                 |                                          | 61.7     |                            |              | Lovastatin   | Started at 2.5mg/day | 675                               |                | 154.40                  |
| 8            | 1998             | LIPID           | Secondary Prevention                     | 62.0     | 52                         | Industry*    | Control      | NA                   | 4431                              | Fixed          | 150.00                  |
|              |                  |                 |                                          | 62.0     |                            |              | Pravastatin  | 40mg/day             | 4445                              |                | 150.00                  |
| 9            | 2000             | GISSI-P         | Secondary Prevention                     | 59.7     | 156                        | Nonindustry* | Pravastatin  | 20mg/day             | 2138                              | Fixed          | 151.80                  |
|              |                  |                 |                                          | 60.0     |                            |              | Control      | NA                   | 2133                              |                | 151.50                  |
| 10           | 2001             | PRINCE          | Primary Prevention                       | 57.4     | 24                         | Industry     | Control      | NA                   | 837                               | Fixed          | 142.90                  |
|              |                  |                 |                                          | 56.8     |                            |              | Pravastatin  | 40mg/day             | 865                               |                | 142.90                  |
| 11           | 2002             | GREACE          | Secondary Prevention                     | 58.0     | 156                        | Nonindustry  | Atorvastatin | Started at 10mg/day  | 800                               | Titration      | 180.00                  |
|              |                  |                 |                                          | 59.0     |                            |              | Control      | NA                   | 800                               |                | 179.00                  |
| 12           | 1998             | Bak et al. 1998 | Primary Prevention                       | 54.6     | 24                         | Industry     | Control      | NA                   | 54                                | Fixed          | 199.15                  |

| Study Number | Publication Year | Trial Name            |                                          | Mean Age | Follow-up duration (weeks) | Sponsor     | Treatment    | Dose of treatment   | Number of participants randomized | Dosing Regimen | LDL at baseline (mg/dL) |
|--------------|------------------|-----------------------|------------------------------------------|----------|----------------------------|-------------|--------------|---------------------|-----------------------------------|----------------|-------------------------|
|              |                  |                       |                                          | 55.3     |                            |             | Pravastatin  | 20mg/day            | 53                                |                | 204.56                  |
| 13           | 2000             | Barter et al. 2000    | Hypercholesterolemia with or without CHD | 57.1     | 24                         | Industry    | Atorvastatin | Started at 10mg/day | 691                               | Titration*     | 201.86                  |
|              |                  |                       |                                          | 56.2     |                            |             | Simvastatin  | Started at 10mg/day | 337                               |                | 200.31                  |
| 14           | 1994             | PMSG-Diabetes         | Primary Prevention in Diabetes           | 58.3     | 16                         | Industry    | Pravastatin  | Started at 10mg/day | 167                               | Titration      | 164.35                  |
|              |                  |                       |                                          | 58.3     |                            |             | Control      | NA                  | 158                               |                | 166.67                  |
| 15           | 1997             | Bertolini et al. 1997 | Hypercholesterolemia with or without CHD | 56.0     | 52                         | Industry    | Atorvastatin | Started at 10mg/day | 227                               | Titration*     | 194.12                  |
|              |                  |                       |                                          | 57.0     |                            |             | Pravastatin  | Started at 20mg/day | 78                                |                | 196.06                  |
| 16           | 1997             | PREDICT               | Secondary Prevention                     | 58.5     | 24                         | Industry    | Control      | NA                  | 348                               | Fixed          | 157.00                  |
|              |                  |                       |                                          | 58.2     |                            |             | Pravastatin  | 40mg/day            | 347                               |                | 155.00                  |
| 17           | 1997             | CIS                   | Secondary Prevention                     | 49.8     | 119                        | Industry    | Simvastatin  | Started at 20mg/day | 129                               | Titration      | 164.50                  |
|              |                  |                       |                                          | 48.8     |                            |             | Control      | NA                  | 125                               |                | 167.40                  |
| 18           | 2006             | DISCOVERY-Alpha       | Hypercholesterolemia with or without CHD | 58.4     | 12                         | Industry    | Rosuvastatin | 10mg/day            | 555                               | Fixed          | 179.18                  |
|              |                  |                       |                                          | 58.0     |                            |             | Atorvastatin | 10mg/day            | 382                               |                | 176.86                  |
| 19           | 1993             | MARS                  | Secondary Prevention                     | 58.0     | 114                        | Industry*   | Lovastatin   | Started at 40mg/day | 123                               | Titration      | 151.20                  |
|              |                  |                       |                                          | 58.0     |                            |             | Control      | NA                  | 124                               |                | 154.68                  |
| 20           | 1994             | EXCEL                 | Hypercholesterolemia with or without CHD | 56.0     | 48                         | Industry    | Control      | NA                  | 1663                              | Titration      | 180.00                  |
|              |                  |                       |                                          | 56.0     |                            |             | Lovastatin   | Started at 20mg/day | 6582                              |                | 180.12                  |
| 21           | 2001             | Branchi et al. 2001   | Hypercholesterolemia with or without CHD | 55.8     | 8                          | Nonindustry | Atorvastatin | 10mg/day            | 117                               | Fixed          | 224.30                  |
|              |                  |                       |                                          | 57.5     |                            |             | Simvastatin  | 20mg/day            | 118                               |                | 231.00                  |
| 22           | 1995             | PLAC-II               | Secondary Prevention                     | 63.0     | 156                        | Industry    | Control      | NA                  | 76                                | Titration      | 164.30                  |
|              |                  |                       |                                          | 63.0     |                            |             | Pravastatin  | Started at 20mg/day | 75                                |                | 167.50                  |
| 23           | 2004             | PROVE IT-TIMI 22      | Acute Coronary Syndrome                  | 58.3     | 52                         | Industry    | Pravastatin  | Started at 40mg/day | 1546                              | Titration      | 106.00                  |
|              |                  |                       |                                          | 58.1     |                            |             | Atorvastatin | 80mg/day            | 1553                              |                | 106.00                  |

| Study Number | Publication Year | Trial Name           |                                          | Mean Age | Follow-up duration (weeks) | Sponsor   | Treatment    | Dose of treatment   | Number of participants randomized | Dosing Regimen | LDL at baseline (mg/dL) |
|--------------|------------------|----------------------|------------------------------------------|----------|----------------------------|-----------|--------------|---------------------|-----------------------------------|----------------|-------------------------|
| 24           | 2004             | CARDS                | Primary Prevention in Diabetes           | 61.8     | 52                         | Industry  | Control      | NA                  | 1290                              | Fixed          | 116.78                  |
|              |                  |                      |                                          | 61.5     |                            |           | Atorvastatin | 10mg/day            | 1322                              |                | 117.56                  |
| 25           | 2007             | METEOR               | Primary Prevention                       | 57.0     | 52                         | Industry  | Rosuvastatin | 40mg/day            | 702                               | Fixed          | 155.00                  |
|              |                  |                      |                                          | 57.0     |                            |           | Control      | NA                  | 282                               |                | 154.00                  |
| 26           | 1997             | ASG-I                | Hypercholesterolemia with or without CHD | 57.0     | 52                         | Industry  | Atorvastatin | 10mg/day            | 529                               | Fixed          | 187.94                  |
|              |                  |                      |                                          | 58.0     |                            |           | Lovastatin   | 20mg/day            | 120                               |                | 182.91                  |
| 27           | 1997             | Davidson et al. 1997 | Hypercholesterolemia with or without CHD | 52.0     | 26                         | Industry  | Simvastatin  | 40mg/day            | 147                               | Fixed          | 199.00                  |
|              |                  |                      |                                          | 52.0     |                            |           | Simvastatin  | 80mg/day            | 147                               |                | 199.00                  |
| 28           | 2007             | SAGE                 | Secondary Prevention                     | 72.4     | 52                         | Industry  | Atorvastatin | 80mg/day            | 446                               | Fixed          | 147.50                  |
|              |                  |                      |                                          | 72.6     |                            |           | Pravastatin  | 40mg/day            | 445                               |                | 144.00                  |
| 29           | 1998             | AFCAPS/TexCAPS       | Primary Prevention                       | 58.0     | 52                         | Industry  | Control      | NA                  | 3251                              | Titration      | 150.00                  |
|              |                  |                      |                                          | 58.0     |                            |           | Lovastatin   | Started at 20mg/day | 3270                              |                | 150.00                  |
| 30           | 1998             | Eriksson et al. 1998 | Primary Prevention                       | 53.7     | 104                        | Industry  | Pravastatin  | 20mg/day            | 532                               | Fixed          | 212.68                  |
|              |                  |                      |                                          | 53.1     |                            |           | Pravastatin  | 40mg/day            | 525                               |                | 212.68                  |
| 31           | 1994             | ACAPS                | Primary prevention                       | 61.3     | 52                         | Industry* | Control      | NA                  | 459                               | Titration      | 155.60                  |
|              |                  |                      |                                          | 61.9     |                            |           | Lovastatin   | Started at 20mg/day | 460                               |                | 156.60                  |
| 32           | 2008             | GISSI-HF             | Heart Failure                            | 68.0     | 52                         | Industry  | Rosuvastatin | 10mg/day            | 2085                              | Fixed          | 122.20                  |
|              |                  |                      |                                          | 68.0     |                            |           | Control      | NA                  | 2115                              |                | 121.04                  |
| 33           | 1996             | Glasser et al. 1996  | Hypercholesterolemia with or without CHD | NA       | 12                         | Industry  | Pravastatin  | 20mg/day            | 258                               | Fixed          | 198.00                  |
|              |                  |                      |                                          | NA       |                            |           | Control      | NA                  | 89                                |                | 201.00                  |
| 34           | 2001             | BCAPS                | Primary Prevention                       | 61.9     | 144                        | Industry  | Control      | NA                  | 398                               | Fixed          | 158.55                  |
|              |                  |                      |                                          | 61.9     |                            |           | Fluvastatin  | 40mg/day            | 395                               |                | 162.41                  |
| 35           | 1997             | LCAS                 | Secondary Prevention                     | 58.4     | 130                        | Industry  | Fluvastatin  | 40mg/day            | 156                               | Fixed          | 146.20                  |
|              |                  |                      |                                          | 59.1     |                            |           | Control      | NA                  | 163                               |                | 144.60                  |

| Study Number | Publication Year | Trial Name              |                                          | Mean Age | Follow-up duration (weeks) | Sponsor     | Treatment    | Dose of treatment   | Number of participants randomized | Dosing Regimen | LDL at baseline (mg/dL) |
|--------------|------------------|-------------------------|------------------------------------------|----------|----------------------------|-------------|--------------|---------------------|-----------------------------------|----------------|-------------------------|
| 36           | 2001             | ASSET                   | Hypercholesterolemia with or without CHD | 60.9     | 6                          | Industry    | Atorvastatin | 10mg/day            | 730                               | Fixed          | 181.20                  |
|              |                  |                         |                                          | 60.1     |                            |             | Simvastatin  | 10mg/day            | 694                               |                | 181.90                  |
| 37           | 1995             | Jacobson et al. 1995    | Primary Prevention                       | 57.0     | 12                         | Industry    | Pravastatin  | 20mg/day            | 182                               | Fixed          | 210.00                  |
|              |                  |                         |                                          | 55.9     |                            |             | Control      | NA                  | 63                                |                | 211.00                  |
| 38           | 1995             | REGRESS                 | Secondary Prevention                     | 56.5     | 52                         | Industry    | Pravastatin  | 40mg/day            | 450                               | Fixed          | 166.28                  |
|              |                  |                         |                                          | 55.9     |                            |             | Control      | NA                  | 434                               |                | 166.67                  |
| 39           | 1999             | CLAPT                   | Secondary Prevention                     | 54.1     | 96                         | Industry    | Lovastatin   | Started at 20mg/day | 112                               | Titration      | 181.00                  |
|              |                  |                         |                                          | 53.7     |                            |             | Control      | NA                  | 114                               |                | 183.00                  |
| 40           | 2007             | Kyeong et al. 2007      | Acute Coronary Syndrome                  | 63.5     | 40                         | Nonindustry | Rosuvastatin | 10mg/day            | 60                                | Fixed          | 139.10                  |
|              |                  |                         |                                          | 63.4     |                            |             | Atorvastatin | 20mg/day            | 57                                |                | 137.70                  |
| 41           | 1999             | TARGET TANGIBLE         | Secondary Prevention                     | 60.5     | 14                         | Industry    | Atorvastatin | Started at 10mg/day | 1897                              | Titration      | 188.00                  |
|              |                  |                         |                                          | 60.9     |                            |             | Simvastatin  | Started at 10mg/day | 959                               |                | 186.00                  |
| 42           | 1996             | CAIUS                   | Primary Prevention                       | 54.9     | 156                        | Industry    | Pravastatin  | 40mg/day            | 151                               | Fixed          | 180.20                  |
|              |                  |                         |                                          | 55.1     |                            |             | Control      | NA                  | 154                               |                | 182.13                  |
| 43           | 2004             | Milionis et al. 2004    | Primary Prevention                       | 58.0     | 12                         | Nonindustry | Atorvastatin | 40mg/day            | 90                                | Fixed          | 216.00                  |
|              |                  |                         |                                          | 58.6     |                            |             | Simvastatin  | 40mg/day            | 90                                |                | 196.10                  |
| 44           | 2000             | Muldoon et al. 2000     | Primary Prevention                       | 46.6     | 24                         | Industry    | Control      | NA                  | 96                                | Fixed          | 187.00                  |
|              |                  |                         |                                          | 46.2     |                            |             | Lovastatin   | 20mg/day            | 98                                |                | 184.00                  |
| 45           | 1996             | SHIGA Pravastatin Study | Secondary Prevention                     | 62.0     | 12                         | Industry    | Pravastatin  | 20mg/day            | 102                               | Fixed          | 139.00                  |
|              |                  |                         |                                          | 62.0     |                            |             | Control      | NA                  | 105                               |                | 135.70                  |
| 46           | 1998             | Napoli et al. 1998      | Primary Prevention                       | 37.0     | 12                         | Nonindustry | Pravastatin  | 40mg/day            | 52                                | Fixed          | 224.30                  |
|              |                  |                         |                                          | 38.0     |                            |             | Control      | NA                  | 52                                |                | 224.28                  |
| 47           | 2000             | WWEDSS                  | Hypercholesterolemia with or without CHD | 52.7     | 24                         | Industry    | Simvastatin  | 40mg/day            | 436                               | Fixed          | 228.15                  |
|              |                  |                         |                                          | 52.9     |                            |             | Simvastatin  | 80mg/day            | 669                               |                | 224.28                  |

| Study Number | Publication Year | Trial Name                             |                                          | Mean Age | Follow-up duration (weeks) | Sponsor     | Treatment    | Dose of treatment   | Number of participants randomized | Dosing Regimen | LDL at baseline (mg/dL) |
|--------------|------------------|----------------------------------------|------------------------------------------|----------|----------------------------|-------------|--------------|---------------------|-----------------------------------|----------------|-------------------------|
| 48           | 1989             | Simvastatin Multicenter Study Group II | Hypercholesterolemia with or without CHD | NA       | 12                         | Nonindustry | Simvastatin  | 20mg/day            | 82                                | Fixed          | 251.00                  |
|              |                  |                                        |                                          | NA       |                            |             | Simvastatin  | 40mg/day            | 80                                |                | 251.00                  |
| 49           | 1995             | PLAC-I                                 | Secondary Prevention                     | NA       | 144                        | Industry    | Pravastatin  | 40mg/day            | 206                               | Fixed          | 164.00                  |
|              |                  |                                        |                                          | NA       |                            |             | Control      | NA                  | 202                               |                | 164.00                  |
| 50           | 2005             | BELLES                                 | Primary Prevention                       | 64.2     | 52                         | Industry    | Atorvastatin | 80mg/day            | 305                               | Fixed          | 175.30                  |
|              |                  |                                        |                                          | 64.5     |                            |             | Pravastatin  | 40mg/day            | 309                               |                | 173.60                  |
| 51           | 1999             | Riegger et al. 1999                    | Secondary Prevention                     | 59.4     | 52                         | Industry    | Fluvastatin  | Started at 40mg/day | 187                               | Titration      | 198.00                  |
|              |                  |                                        |                                          | 60.2     |                            |             | Control      | NA                  | 178                               |                | 193.00                  |
| 52           | 1996             | CARE                                   | Secondary Prevention                     | 59.0     | 52                         | Industry    | Control      | 40mg/day            | 2015                              | Fixed          | 139.00                  |
|              |                  |                                        |                                          | 59.0     |                            |             | Pravastatin  | NA                  | 2009                              |                | 139.00                  |
| 53           | 1991             | Sahni et al. 1991                      | Secondary Prevention                     | 64.2     | 40                         | Nonindustry | Lovastatin   | Started at 20mg/day | 79                                | Titration      | 141.00                  |
|              |                  |                                        |                                          | 56.3     |                            |             | Control      | NA                  | 78                                |                | 136.00                  |
| 54           | 1995             | KAPS                                   | Primary Prevention                       | 57.5     | 156                        | Industry    | Control      | NA                  | 223                               | Fixed          | 185.61                  |
|              |                  |                                        |                                          | 57.3     |                            |             | Pravastatin  | 40mg/day            | 224                               |                | 185.61                  |
| 55           | 2001             | MIRACL                                 | Acute Coronary Syndrome                  | 65.0     | 16                         | Industry    | Control      | NA                  | 1548                              | Fixed          | 124.00                  |
|              |                  |                                        |                                          | 65.0     |                            |             | Atorvastatin | 80mg/day            | 1538                              |                | 124.00                  |
| 56           | 1999             | IQLMG                                  | Hypercholesterolemia with or without CHD | 50.0     | 12                         | Industry    | Simvastatin  | 20mg/day            | 194                               | Fixed          | 210.00                  |
|              |                  |                                        |                                          | 52.0     |                            |             | Pravastatin  | 40mg/day            | 193                               |                | 205.00                  |
| 57           | 1999             | FLARE                                  | Secondary Prevention                     | 60.0     | 40                         | Industry    | Fluvastatin  | 80mg/day            | 409                               | Fixed          | 153.13                  |
|              |                  |                                        |                                          | 61.0     |                            |             | Control      | NA                  | 425                               |                | 152.75                  |
| 58           | 1995             | WOSCOPS                                | Primary Prevention                       | 55.1     | 52                         | Industry    | Control      | NA                  | 3230                              | Fixed          | 192.00                  |
|              |                  |                                        |                                          | 55.3     |                            |             | Pravastatin  | 40mg/day            | 3256                              |                | 192.00                  |
| 59           | 2001             | ASAP                                   | Familial hypercholesterolemia            | NA       | 104                        | Industry    | Atorvastatin | Started at 40mg/day | 162                               | Titration**    | 309.36                  |
|              |                  |                                        |                                          | NA       |                            |             | Simvastatin  | Started at 20mg/day | 168                               |                | 322.12                  |

| Study Number | Publication Year | Trial Name                     |                                          | Mean Age | Follow-up duration (weeks) | Sponsor      | Treatment    | Dose of treatment   | Number of participants randomized | Dosing Regimen | LDL at baseline (mg/dL) |
|--------------|------------------|--------------------------------|------------------------------------------|----------|----------------------------|--------------|--------------|---------------------|-----------------------------------|----------------|-------------------------|
| 60           | 1990             | Stein et al. 1990              | Hypercholesterolemia with or without CHD | NA       | 12                         | Industry     | Simvastatin  | 20mg/day            | 84                                | Fixed          | 245.17                  |
|              |                  |                                |                                          | NA       |                            |              | Simvastatin  | 40mg/day            | 81                                |                | 245.17                  |
| 61           | 1998             | EDS-US                         | Primary Prevention                       | 55.5     | 24                         | Industry     | Simvastatin  | 40mg/day            | 207                               | Fixed          | 290.00                  |
|              |                  |                                |                                          | 54.3     |                            |              | Simvastatin  | 80mg/day            | 314                               |                | 205.00                  |
| 62           | 2000             | SCAT                           | Secondary Prevention                     | 61.0     | 190                        | Industry     | Simvastatin  | Started at 10mg/day | 230                               | Titration      | 131.09                  |
|              |                  |                                |                                          | 61.0     |                            |              | Control      | NA                  | 230                               |                | 128.77                  |
| 63           | 1994             | CCAIT                          | Secondary Prevention                     | 53.0     | 104                        | Industry     | Lovastatin   | Started at 20mg/day | 165                               | Titration      | 173.00                  |
|              |                  |                                |                                          | 53.0     |                            |              | Control      | NA                  | 166                               |                | 172.00                  |
| 64           | 1994             | LRTSG                          | Secondary Prevention                     | 62.0     | 24                         | Industry     | Lovastatin   | 80mg/day            | 203                               | Fixed          | 130.00                  |
|              |                  |                                |                                          | 62.0     |                            |              | Control      | NA                  | 201                               |                | 126.00                  |
| 65           | 1996             | QLMG                           | Primary Prevention                       | 49.3     | 12                         | Industry     | Lovastatin   | 40mg/day            | 211                               | Fixed          | 195.00                  |
|              |                  |                                |                                          | 51.0     |                            |              | Pravastatin  | 40mg/day            | 215                               |                | 202.00                  |
| 66           | 2002             | ALLHAT-LTT                     | Primary Prevention                       | 66.4     | 104                        | Nonindustry  | Pravastatin  | Started at 20mg/day | 850                               | Titration      | 145.60                  |
|              |                  |                                |                                          | 66.3     |                            |              | Control      | NA                  | 508                               |                | 145.50                  |
| 67           | 2002             | MRC/BHF Heart Protection Study | Hypercholesterolemia with or without CHD | 64.0     | 52                         | Nonindustry* | Simvastatin  | 40mg/day            | 10269                             | Fixed          | 131.48                  |
|              |                  |                                |                                          | 64.0     |                            |              | Control      | NA                  | 10267                             |                | 131.48                  |
| 68           | 2003             | CHESS                          | Hypercholesterolemia with or without CHD | 56.5     | 24                         | Industry     | Simvastatin  | 80mg/day            | 453                               | Fixed          | 190.30                  |
|              |                  |                                |                                          | 56.5     |                            |              | Atorvastatin | 80mg/day            | 464                               |                | 187.50                  |
| 69           | 2003             | Ballantyne et al. 2003         | Hypercholesterolemia with or without CHD | 57.8     | 12                         | Industry     | Atorvastatin | Started at 10mg/day | 248                               | Titration      | 179.81                  |
|              |                  |                                |                                          | 56.9     |                            |              | Control      | NA                  | 60                                |                | 177.88                  |
| 70           | 2003             | ADVOCATE                       | Hypercholesterolemia with or without CHD | 51.6     | 16                         | Industry     | Atorvastatin | Started at 10mg/day | 82                                | Titration*     | 196.00                  |
|              |                  |                                |                                          | 53.7     |                            |              | Simvastatin  | Started at 10mg/day | 76                                |                | 192.00                  |
| 71           | 2003             | Bruckert et al. 2003           | Primary Hypercholesterolemia             | 75.5     | 26                         | Industry     | Fluvastatin  | 80mg/day            | 607                               | Fixed          | 200.00                  |

| Study Number | Publication Year | Trial Name             |                                          | Mean Age | Follow-up duration (weeks) | Sponsor     | Treatment    | Dose of treatment   | Number of participants randomized | Dosing Regimen | LDL at baseline (mg/dL) |
|--------------|------------------|------------------------|------------------------------------------|----------|----------------------------|-------------|--------------|---------------------|-----------------------------------|----------------|-------------------------|
|              |                  |                        |                                          | 75.5     |                            |             | Control      | NA                  | 622                               |                | 200.00                  |
| 72           | 2002             | Davidson et al. 2002-b | Hypercholesterolemia with or without CHD | 58.8     | 12                         | Industry    | Control      | NA                  | 70                                | Fixed          | 177.00                  |
|              |                  |                        |                                          | 56.4     |                            |             | Simvastatin  | Started at 10mg/day | 263                               |                | 179.00                  |
| 73           | 2003             | Kent et al. 2003       | Hypercholesterolemia with or without CHD | 62.0     | 12                         | Nonindustry | Pravastatin  | 40mg/day            | 67                                | Fixed          | 152.00                  |
|              |                  |                        |                                          | 58.0     |                            |             | Atorvastatin | 80mg/day            | 63                                |                | 149.00                  |
| 74           | 2003             | Kerzner et al. 2003    | Primary Prevention                       | 56.0     | 12                         | Industry    | Lovastatin   | Started at 10mg/day | 220                               | Titration      | 178.00                  |
|              |                  |                        |                                          | 58.0     |                            |             | Control      | NA                  | 64                                |                | 178.00                  |
| 75           | 2002             | FLORIDA                | Acute Coronary Syndrome                  | 61.0     | 52                         | Industry    | Fluvastatin  | 80mg/day            | 265                               | Fixed          | 135.34                  |
|              |                  |                        |                                          | 60.0     |                            |             | Control      | NA                  | 275                               |                | 139.21                  |
| 76           | 2003             | Melani et al. 2003     | Primary Hypercholesterolemia             | 55.1     | 12                         | Industry    | Pravastatin  | Started at 10mg/day | 205                               | Titration      | 177.88                  |
|              |                  |                        |                                          | 53.4     |                            |             | Control      | NA                  | 65                                |                | 177.88                  |
| 77           | 2003             | TREAT TO TARGET        | Secondary Prevention                     | 63.0     | 52                         | Industry    | Atorvastatin | 20mg/day            | 552                               | Titration*     | 200.70                  |
|              |                  |                        |                                          | 62.5     |                            |             | Simvastatin  | 20mg/day            | 535                               |                | 200.70                  |
| 78           | 2002             | FAST                   | Primary Prevention                       | 65.6     | 104                        | Nonindustry | Pravastatin  | 10mg/day            | 83                                | Fixed          | 160.70                  |
|              |                  |                        |                                          | 67.1     |                            |             | Control      | NA                  | 81                                |                | 171.60                  |
| 79           | 2002             | LIPS                   | Secondary Prevention                     | 60.0     | 12                         | Industry    | Fluvastatin  | 80mg/day            | 757                               | Fixed          | 131.00                  |
|              |                  |                        |                                          | 60.0     |                            |             | Control      | NA                  | 725                               |                | 132.00                  |
| 80           | 2002             | PROSPER                | Hypercholesterolemia with or without CHD | 75.3     | 12                         | Industry*   | Control      | NA                  | 2871                              | Fixed          | 146.95                  |
|              |                  |                        |                                          | 75.4     |                            |             | Pravastatin  | 40mg/day            | 2848                              |                | 146.95                  |
| 81           | 2003             | HeFH                   | Familial hypercholesterolemia            | 48.0     | 18                         | Industry    | Rosuvastatin | Started at 20mg/day | 436                               | Titration      | 292.00                  |
|              |                  |                        |                                          | 47.0     |                            |             | Atorvastatin | Started at 20mg/day | 187                               |                | 288.00                  |
| 82           | 2002             | ARBITER                | Hypercholesterolemia with or without CHD | 61.0     | 52                         | Nonindustry | Pravastatin  | 40mg/day            | 82                                | Fixed          | 155.00                  |
|              |                  |                        |                                          | 54.0     |                            |             | Atorvastatin | 80mg/day            | 79                                |                | 148.00                  |
| 83           | 2003             | Zou et al. 2003        | Acute Coronary Syndrome                  | 61.2     | 52                         | Nonindustry | Simvastatin  | 10mg/day            | 98                                | Fixed          | 136.20                  |

| Study Number | Publication Year | Trial Name             |                                          | Mean Age | Follow-up duration (weeks) | Sponsor     | Treatment    | Dose of treatment   | Number of participants randomized | Dosing Regimen | LDL at baseline (mg/dL) |
|--------------|------------------|------------------------|------------------------------------------|----------|----------------------------|-------------|--------------|---------------------|-----------------------------------|----------------|-------------------------|
|              |                  |                        |                                          | 61.3     |                            |             | Simvastatin  | 20mg/day            | 99                                |                | 135.70                  |
| 84           | 2007             | ASTRONOMER             | Carotid stenosis                         | 58.0     | 240                        | Industry*   | Rosuvastatin | 40mg/day            | 134                               | Fixed          | 122.97                  |
|              |                  |                        |                                          | 57.9     |                            |             | Control      | NA                  | 135                               |                | 120.65                  |
|              |                  |                        |                                          |          |                            |             |              |                     |                                   |                |                         |
| 85           | 2010             | Colivicchi et al. 2010 | Secondary Prevention                     | 73.9     | 52                         | Nonindustry | Atorvastatin | Started at 20mg/day | 146                               | Titration      | 123.00                  |
|              |                  |                        |                                          | 75.2     |                            |             | Atorvastatin | 80 mg/day           | 144                               |                | 126.00                  |
| 86           | 2008             | ECLIPSE                | Secondary Prevention                     | 62.5     | 24                         | Industry    | Rosuvastatin | Started at 10mg/day | 522                               | Titration*     | 189.20                  |
|              |                  |                        |                                          | 62.2     |                            |             | Atorvastatin | Started at 10mg/day | 514                               |                | 188.30                  |
| 87           | 2009             | SPACE ROCKET           | Acute Coronary Syndrome                  | 62.1     | 52                         | Industry*   | Rosuvastatin | 40mg/day            | 633                               | Fixed          | 128.38                  |
|              |                  |                        |                                          | 62.5     |                            |             | Simvastatin  | 40mg/day            | 630                               |                | 124.52                  |
| 88           | 2009             | Hong et al. 2009       | Hypercholesterolemia with or without CHD | 58.0     | 52                         | Nonindustry | Simvastatin  | 20mg/day            | 50                                | Fixed          | 119.00                  |
|              |                  |                        |                                          | 59.0     |                            |             | Rosuvastatin | 10mg/day            | 50                                |                | 116.00                  |
| 89           | 2010             | Kadoglou et al. 2010   | Carotid stenosis                         | 64.8     | 52                         | Nonindustry | Atorvastatin | 10-20 mg/d          | 70                                | Fixed          | 162.12                  |
|              |                  |                        |                                          | 63.2     |                            |             | Atorvastatin | 80 mg/d             | 70                                |                | 167.06                  |
| 90           | 2007             | CORONA                 | Heart Failure                            | 73.0     | 144                        | Industry    | Control      | NA                  | 2497                              | Fixed          | 137.66                  |
|              |                  |                        |                                          | 73.0     |                            |             | Rosuvastatin | 10mg/day            | 2514                              |                | 136.89                  |
| 91           | 2008             | Konduracka et al. 2008 | Primary Prevention in Diabetes           | NA       | 24                         | Industry    | Atorvastatin | 40mg/day            | 154                               | Fixed          | 119.88                  |
|              |                  |                        |                                          | NA       |                            |             | Control      | NA                  | 50                                |                | 119.88                  |
| 92           | 2008             | Kostapanos et al. 2008 | Primary hypercholesterolemia without CHD | 50.0     | 12                         | Nonindustry | Rosuvastatin | 20mg/day            | 60                                | Fixed          | 233.00                  |
|              |                  |                        |                                          | 49.0     |                            |             | Control      | NA                  | 60                                |                | 237.00                  |
| 93           | 2008             | SUBARU                 | Primary Prevention                       | 64.4     | 8                          | Nonindustry | Atorvastatin | 10mg/day            | 213                               | Fixed          | 109.30                  |
|              |                  |                        |                                          | 66.7     |                            |             | Rosuvastatin | 5mg/day             | 214                               |                | 102.90                  |
| 94           | 2010             | CENTAURUS              | Acute Coronary Syndrome                  | 60.0     | 12                         | Industry    | Rosuvastatin | 20 mg/d             | 437                               | Fixed          | 129.00                  |
|              |                  |                        |                                          | 59.0     |                            |             | Atorvastatin | 80 mg/d             | 450                               |                | 128.00                  |
| 95           | 2008             | DISCOVERY-Beta         | Primary hypercholesterolemia             | 62.9     | 12                         | Industry    | Rosuvastatin | 10mg/day            | 334                               | Fixed          | 182.91                  |



| Study Number | Publication Year | Trial Name          |                                                                   | Mean Age | Follow-up duration (weeks) | Sponsor     | Treatment    | Dose of treatment   | Number of participants randomized | Dosing Regimen | LDL at baseline (mg/dL) |
|--------------|------------------|---------------------|-------------------------------------------------------------------|----------|----------------------------|-------------|--------------|---------------------|-----------------------------------|----------------|-------------------------|
|              |                  |                     |                                                                   | 63.9     |                            |             | Simvastatin  | 20mg/day            | 170                               |                | 180.20                  |
| 96           | 2007             | Lewis et al. 2007   | Hypercholesterolemia with Chronic, Well Compensated Liver Disease | 49.9     | 36                         | Industry    | Pravastatin  | 80mg/day            | 163                               | Fixed          | 138.80                  |
|              |                  |                     |                                                                   | 49.8     |                            |             | Control      | NA                  | 163                               |                | 140.50                  |
| 97           | 2009             | RCASS               | Cerebral Artery Stenosis                                          | 63.0     | 104                        | Industry    | Control      | NA                  | 114                               | Fixed          | 150.43                  |
|              |                  |                     |                                                                   | 63.0     |                            |             | Simvastatin  | 20mg/day            | 113                               |                | 151.59                  |
| 98           | 2009             | Ose et al. 2009     | Primary hypercholesterolemia                                      | 58.6     | 12                         | Industry    | Simvastatin  | 20mg/day            | 108                               | Fixed          | 184.10                  |
|              |                  |                     |                                                                   | 58.4     |                            |             | Simvastatin  | 40mg/day            | 111                               |                | 184.00                  |
| 99           | 2010             | Alcala et al. 2010  | Primary Prevention                                                | 48.0     | 24                         | Nonindustry | Control      | NA                  | 70                                | Fixed          | 178.00                  |
|              |                  |                     |                                                                   | 48.0     |                            |             | Pravastatin  | 40mg/day            | 61                                |                | 174.00                  |
| 100          | 2006             | SPARCL              | Secondary Prevention                                              | 63.0     | 312                        | Industry    | Atorvastatin | 80mg/day            | 2365                              | Fixed          | 132.70                  |
|              |                  |                     |                                                                   | 62.5     |                            |             | Control      | NA                  | 2366                              |                | 133.70                  |
| 101          | 2004             | Bae et al. 2004     | Secondary Prevention                                              | 60.0     | 24                         | Nonindustry | Atorvastatin | 10mg/day            | 105                               | Fixed          | 122.00                  |
|              |                  |                     |                                                                   | 60.0     |                            |             | Control      | NA                  | 100                               |                | 113.00                  |
| 102          | 2004             | Bays et al. 2004    | Primary hypercholesterolemia                                      | 54.9     | 12                         | Industry    | Simvastatin  | Started at 10mg/day | 622                               | Titration      | 177.50                  |
|              |                  |                     |                                                                   | 56.0     |                            |             | Control      | NA                  | 148                               |                | 177.90                  |
| 103          | 2007             | ANDROMEDA           | Primary Prevention in Diabetes                                    | 61.2     | 16                         | Industry    | Rosuvastatin | Started at 10mg/day | 248                               | Titration*     | 131.48                  |
|              |                  |                     |                                                                   | 61.9     |                            |             | Atorvastatin | Started at 10mg/day | 246                               |                | 131.48                  |
| 104          | 2008             | CAP                 | Secondary Prevention                                              | 62.8     | 26                         | Industry    | Atorvastatin | 10mg/day            | 170                               | Fixed          | 126.00                  |
|              |                  |                     |                                                                   | 62.3     |                            |             | Atorvastatin | 80mg/day            | 170                               |                | 126.00                  |
| 105          | 2004             | A to Z              | Acute Coronary Syndrome                                           | 61.0     | 32                         | Industry    | Simvastatin  | 20mg/day            | 1904                              | Titration*     | 111.00                  |
|              |                  |                     |                                                                   | 61.0     |                            |             | Simvastatin  | 80mg/day            | 1950                              |                | 112.00                  |
| 106          | 2004             | PREVEND IT          | Microalbuminuria                                                  | 50.5     | 52                         | Industry    | Control      | NA                  | 409                               | Fixed          | 154.70                  |
|              |                  |                     |                                                                   | 52.1     |                            |             | Pravastatin  | 40mg/day            | 412                               |                | 158.55                  |
| 107          | 2004             | Durazzo et al. 2004 | Vascular surgery with or without                                  | 65.9     | 6                          | Nonindustry | Atorvastatin | 20mg/day            | 50                                | Fixed          | 144.60                  |

| Study Number | Publication Year | Trial Name           |                                          | Mean Age | Follow-up duration (weeks) | Sponsor     | Treatment    | Dose of treatment   | Number of participants randomized | Dosing Regimen | LDL at baseline (mg/dL) |
|--------------|------------------|----------------------|------------------------------------------|----------|----------------------------|-------------|--------------|---------------------|-----------------------------------|----------------|-------------------------|
|              |                  |                      | CHD                                      | 68.4     |                            |             | Control      | NA                  | 50                                |                | 139.65                  |
| 108          | 2005             | DISCOVERY-Penta      | Hypercholesterolemia with or without CHD | 59.2     | 12                         | Industry    | Rosuvastatin | 10mg/day            | 358                               | Fixed          | 171.00                  |
|              |                  |                      |                                          | 59.0     |                            |             | Atorvastatin | 10mg/day            | 383                               |                | 174.00                  |
| 109          | 2004             | Goldberg et al. 2004 | Primary hypercholesterolemia             | NA       | 12                         | Industry    | Control      | NA                  | 93                                | Titration      | 174.00                  |
|              |                  |                      |                                          | NA       |                            |             | Simvastatin  | Started at 10mg/day | 349                               |                | 175.00                  |
| 110          | 2004             | Harris et al. 2004   | Primary Prevention                       | 54.0     | 24                         | Nonindustry | Control      | NA                  | 56                                | Fixed          | 181.00                  |
|              |                  |                      |                                          | 54.0     |                            |             | Simvastatin  | 40mg/day            | 50                                |                | 184.00                  |
| 111          | 2005             | RADAR                | Secondary Prevention                     | 60.7     | 18                         | Industry    | Rosuvastatin | Started at 10mg/day | 230                               | Titration*     | 139.21                  |
|              |                  |                      |                                          | 60.2     |                            |             | Atorvastatin | Started at 20mg/day | 231                               |                | 143.08                  |
| 112          | 2006             | ASPEN                | Primary Prevention                       | 60.5     | 208                        | Industry    | Atorvastatin | 10mg/day            | 959                               | Fixed          | 114.00                  |
|              |                  |                      |                                          | 60.4     |                            |             | Control      | NA                  | 946                               |                | 114.00                  |
| 113          | 2004             | ALLIANCE             | Secondary Prevention                     | 61.1     | 52                         | Industry    | Atorvastatin | Started at 10mg/day | 1217                              | Titration      | 147.00                  |
|              |                  |                      |                                          | 61.3     |                            |             | Control      | NA                  | 1225                              |                | 147.20                  |
| 114          | 2005             | TNT                  | Secondary Prevention                     | 60.9     | 52                         | Industry    | Atorvastatin | 10mg/day            | 4866                              | Fixed          | 98.00                   |
|              |                  |                      |                                          | 61.2     |                            |             | Atorvastatin | 80mg/day            | 4889                              |                | 97.00                   |
| 115          | 2007             | POLARIS              | Secondary Prevention                     | 62.6     | 26                         | Industry    | Rosuvastatin | Started at 20mg/day | 432                               | Titration      | 189.30                  |
|              |                  |                      |                                          | 61.6     |                            |             | Atorvastatin | Started at 40mg/day | 439                               |                | 189.00                  |
| 116          | 2005             | PCABG                | Secondary Prevention                     | 59.6     | 52                         | Industry    | Pravastatin  | Started at 10mg/day | 152                               | Titration      | 141.40                  |
|              |                  |                      |                                          | 58.2     |                            |             | Control      | NA                  | 151                               |                | 141.10                  |
| 117          | 2006             | ATOROS               | Primary Prevention                       | 53.5     | 24                         | Nonindustry | Rosuvastatin | Started at 10mg/day | 60                                | Titration      | 205.00                  |
|              |                  |                      |                                          | 53.3     |                            |             | Atorvastatin | Started at 20mg/day | 60                                |                | 204.00                  |
| 118          | 2004             | JUST                 | Secondary Prevention                     | 58.3     | 104                        | Nonindustry | Simvastatin  | 10mg/day            | 146                               | Fixed          | 154.10                  |
|              |                  |                      |                                          | 59.1     |                            |             | Control      | NA                  | 153                               |                | 153.40                  |

| Study Number | Publication Year | Trial Name            |                                | Mean Age | Follow-up duration (weeks) | Sponsor     | Treatment    | Dose of treatment   | Number of participants randomized | Dosing Regimen | LDL at baseline (mg/dL) |
|--------------|------------------|-----------------------|--------------------------------|----------|----------------------------|-------------|--------------|---------------------|-----------------------------------|----------------|-------------------------|
| 119          | 2007             | STAT                  | Secondary Prevention           | 58.0     | 16                         | Industry    | Simvastatin  | 40mg/day            | 119                               | Fixed          | 138.82                  |
|              |                  |                       |                                | 58.0     |                            |             | Atorvastatin | 80mg/day            | 116                               |                | 143.08                  |
| 120          | 2004             | PCS                   | Secondary Prevention           | 59.2     | 260                        | Industry    | Pravastatin  | 10mg/day            | 54                                | Fixed          | 128.70                  |
|              |                  |                       |                                | 59.9     |                            |             | Control      | NA                  | 66                                |                | 128.30                  |
| 121          | 2006             | MEGA                  | Primary Prevention             | 58.4     | 52                         | Industry    | Control      | NA                  | 3748                              | Titration      | 156.61                  |
|              |                  |                       |                                | 58.2     |                            |             | Pravastatin  | Started at 10mg/day | 3636                              |                | 156.61                  |
| 122          | 2004             | REVERSAL              | Secondary Prevention           | 56.6     | 72                         | Industry    | Pravastatin  | 40mg/day            | 249                               | Fixed          | 150.20                  |
|              |                  |                       |                                | 55.8     |                            |             | Atorvastatin | 80mg/day            | 253                               |                | 150.20                  |
| 123          | 2005             | IDEAL                 | Secondary Prevention           | 61.6     | 52                         | Industry    | Simvastatin  | Started at 20mg/day | 4290                              | Titration      | 121.40                  |
|              |                  |                       |                                | 61.8     |                            |             | Atorvastatin | Started at 80mg/day | 4200                              |                | 121.60                  |
| 124          | 2005             | Sardo et al. 2005     | Primary Prevention             | 57.1     | 12                         | Nonindustry | Control      | NA                  | 106                               | Fixed          | 220.04                  |
|              |                  |                       |                                | 57.1     |                            |             | Atorvastatin | 10mg/day            | 99                                |                | 216.55                  |
| 125          | 2006             | Schermund et al. 2006 | Primary Prevention             | 61.0     | 52                         | Industry    | Atorvastatin | 10mg/day            | 236                               | Fixed          | 108.00                  |
|              |                  |                       |                                | 62.0     |                            |             | Atorvastatin | 80mg/day            | 235                               |                | 106.00                  |
| 126          | 2004             | ASCOT-LLA             | Primary Prevention             | 63.1     | 52                         | Industry    | Atorvastatin | 10mg/day            | 4458                              | Fixed          | 133.05                  |
|              |                  |                       |                                | 63.2     |                            |             | Control      | NA                  | 4384                              |                | 133.05                  |
| 127          | 2006             | Sola et al. 2006      | Heart Failure                  | 54.1     | 52                         | Nonindustry | Control      | NA                  | 54                                | Fixed          | 124.00                  |
|              |                  |                       |                                | 53.3     |                            |             | Atorvastatin | 20mg/day            | 54                                |                | 118.00                  |
| 128          | 2005             | Stone et al. 2005     | Secondary Prevention           | NA       | 52                         | Industry    | Atorvastatin | 80mg/day            | 96                                | Titration      | 149.00                  |
|              |                  |                       |                                | NA       |                            |             | Control      | NA                  | 103                               |                | 151.00                  |
| 129          | 2004             | DISCOVERY             | Primary hypercholesterolemia   | 60.7     | 12                         | Industry    | Rosuvastatin | 10mg/day            | 686                               | Fixed          | 174.01                  |
|              |                  |                       |                                | 60.8     |                            |             | Atorvastatin | 10mg/day            | 338                               |                | 170.15                  |
| 130          | 2005             | CORALL                | Primary Prevention in Diabetes | 61.0     | 24                         | Industry    | Rosuvastatin | Started at 10mg/day | 131                               | Titration*     | 163.57                  |
|              |                  |                       |                                | 59.0     |                            |             | Atorvastatin | Started at 20mg/day | 132                               |                | 171.31                  |

| Study Number | Publication Year | Trial Name            |                                          | Mean Age | Follow-up duration (weeks) | Sponsor     | Treatment    | Dose of treatment   | Number of participants randomized | Dosing Regimen | LDL at baseline (mg/dL) |
|--------------|------------------|-----------------------|------------------------------------------|----------|----------------------------|-------------|--------------|---------------------|-----------------------------------|----------------|-------------------------|
| 131          | 2005             | ARTHEROMA             | Secondary Prevention                     | 59.4     | 156                        | Industry    | Control      | NA                  | 146                               | Titration      | 142.00                  |
|              |                  |                       |                                          | 59.3     |                            |             | Pravastatin  | Started at 10mg/day | 142                               |                | 143.30                  |
| 132          | 2007             | Yu et al. 2007        | Secondary Prevention                     | 66.0     | 26                         | Industry    | Atorvastatin | 10mg/day            | 55                                | Fixed          | 116.00                  |
|              |                  |                       |                                          | 66.0     |                            |             | Atorvastatin | 80mg/day            | 57                                |                | 105.00                  |
| 133          | 2010             | Park et al. 2010      | Metabolic Syndrome                       | 60.5     | 6                          | Industry    | Rosuvastatin | 10mg/day            | 172                               | Fixed          | 163.64                  |
|              |                  |                       |                                          | 59.0     |                            |             | Atorvastatin | 10mg/day            | 178                               |                | 163.85                  |
| 134          | 2008             | JUPITER               | Primary Prevention                       | 66.0     | 52                         | Industry    | Rosuvastatin | 20mg/day            | 8847                              | Fixed          | 108.00                  |
|              |                  |                       |                                          | 66.0     |                            |             | Control      | NA                  | 8852                              |                | 108.00                  |
| 135          | 2008             | OACIS-LIPID           | Acute Coronary Syndrome                  | 63.6     | 36                         | Nonindustry | Pravastatin  | 10mg/day            | 176                               | Fixed          | 150.00                  |
|              |                  |                       |                                          | 62.9     |                            |             | Control      | NA                  | 177                               |                | 146.00                  |
| 136          | 2008             | Sdringola et al. 2008 | Secondary Prevention                     | 64.0     | 24                         | Industry    | Control      | NA                  | 73                                | Fixed          | 130.00                  |
|              |                  |                       |                                          | 70.0     |                            |             | Atorvastatin | 80mg/day            | 72                                |                | 128.00                  |
| 137          | 2009             | Zhao et al. 2009      | Secondary Prevention                     | 69.8     | 8                          | Nonindustry | Atorvastatin | 80mg/day            | 85                                | Fixed          | 118.90                  |
|              |                  |                       |                                          | 72.3     |                            |             | Atorvastatin | 20mg/day            | 79                                |                | 118.60                  |
| 138          | 2007             | DISCOVERY-Asia        | Secondary Prevention                     | 60.3     | 12                         | Industry    | Rosuvastatin | 10mg/day            | 950                               | Titration      | 167.05                  |
|              |                  |                       |                                          | 60.8     |                            |             | Atorvastatin | 10mg/day            | 472                               |                | 169.37                  |
| 139          | 1995             | Guillen et al. 1995   | Hypercholesterolemia with or without CHD | 47.8     | 26                         | Industry    | Control      | NA                  | 74                                | Titration*     | 155.80                  |
|              |                  |                       |                                          | 46.8     |                            |             | Pravastatin  | Started at 10mg/day | 76                                |                | 156.80                  |
| 140          | 2006             | PULSAR                | Secondary Prevention                     | 60.2     | 6                          | Industry    | Rosuvastatin | 10mg/day            | 504                               | Fixed          | 165.10                  |
|              |                  |                       |                                          | 60.7     |                            |             | Atorvastatin | 20mg/day            | 492                               |                | 164.90                  |
| 141          | 2005             | URANUS                | Primary Prevention in Diabetes           | 63.5     | 16                         | Industry    | Rosuvastatin | Started at 10mg/day | 232                               | Titration      | 177.88                  |
|              |                  |                       |                                          | 65.0     |                            |             | Atorvastatin | Started at 10mg/day | 233                               |                | 177.88                  |
| 142          | 2011             | SATURN                | Secondary Prevention                     | 57.9     | 104                        | Industry*   | Atorvastatin | 80mg/day            | 519                               | Fixed          | 119.90                  |
|              |                  |                       |                                          | 57.4     |                            |             | Rosuvastatin | 40mg/day            | 520                               |                | 120.00                  |

| Study Number | Publication Year | Trial Name                 |                                          | Mean Age | Follow-up duration (weeks) | Sponsor     | Treatment    | Dose of treatment | Number of participants randomized | Dosing Regimen | LDL at baseline (mg/dL) |
|--------------|------------------|----------------------------|------------------------------------------|----------|----------------------------|-------------|--------------|-------------------|-----------------------------------|----------------|-------------------------|
| 143          | 2011             | Hong et al. 2011           | Secondary Prevention                     | 59.0     | 48                         | Nonindustry | Rosuvastatin | 20mg/day          | 65                                | Fixed          | 122.00                  |
|              |                  |                            |                                          | 58.0     |                            |             | Atorvastatin | 40mg/day          | 63                                |                | 117.00                  |
| 144          | 2011             | PATROL                     | Primary Prevention                       | 61.5     | 16                         | Nonindustry | Atorvastatin | 10mg/day          | 99                                | Fixed          | 162.00                  |
|              |                  |                            |                                          | 61.7     |                            |             | Rosuvastatin | 2.5mg/day         | 100                               |                | 171.00                  |
| 145          | 2012             | LUNAR                      | Acute Coronary Syndrome                  | 53.0     | 12                         | Industry    | Rosuvastatin | 20mg/day          | 246                               | Fixed          | 138.40                  |
|              |                  |                            |                                          | 52.8     |                            |             | Rosuvastatin | 40mg/day          | 251                               |                | 138.80                  |
|              |                  |                            |                                          | 52.9     |                            |             | Atorvastatin | 80mg/day          | 257                               |                | 133.20                  |
| 146          | 1993             | PMSGII                     | Hypercholesterolemia with or without CHD | 52.8     | 8                          | Industry    | Control      | NA                | 60                                | Fixed          | 232.00                  |
|              |                  |                            |                                          | 50.8     |                            |             | Pravastatin  | 40mg/day          | 63                                |                | 236.00                  |
|              |                  |                            |                                          | 51.6     |                            |             | Pravastatin  | 80mg/day          | 63                                |                | 236.00                  |
| 147          | 2001             | DALI                       | Primary Prevention in Diabetes           | 58.5     | 30                         | Industry    | Control      | NA                | 72                                | Fixed          | 146.90                  |
|              |                  |                            |                                          | 59.7     |                            |             | Atorvastatin | 10mg/day          | 73                                |                | 143.08                  |
|              |                  |                            |                                          | 60.1     |                            |             | Atorvastatin | 80mg/day          | 72                                |                | 143.08                  |
| 148          | 1994             | European Fluvastatin Study | Hypercholesterolemia with or without CHD | 52.4     | 6                          | Industry    | Control      | NA                | 136                               | Fixed          | 244.30                  |
|              |                  |                            |                                          | 52.7     |                            |             | Fluvastatin  | 20mg/day          | 117                               |                | 241.10                  |
|              |                  |                            |                                          | 49.4     |                            |             | Fluvastatin  | 40mg/day          | 170                               |                | 233.10                  |
| 149          | 2000             | Farnier et al. 2000        | Hypercholesterolemia with or without CHD | 50.0     | 6                          | Industry    | Atorvastatin | 10mg/day          | 109                               | Fixed          | 247.00                  |
|              |                  |                            |                                          | 51.0     |                            |             | Simvastatin  | 20mg/day          | 109                               |                | 237.00                  |
|              |                  |                            |                                          | 51.0     |                            |             | Simvastatin  | 10mg/day          | 54                                |                | 242.00                  |
| 150          | 1994             | Insull et al. 1994         | Hypercholesterolemia with or without CHD | 53.7     | 6                          | Industry    | Fluvastatin  | 10mg/day          | 69                                | Fixed          | 221.00                  |
|              |                  |                            |                                          | 53.7     |                            |             | Fluvastatin  | 20mg/day          | 70                                |                | 213.00                  |
|              |                  |                            |                                          | 53.7     |                            |             | Control      | NA                | 68                                |                | 213.00                  |
| 151          | 1995             | Haffner et al. 1995        | Hypercholesterolemia with or without CHD | 55.7     | 24                         | Industry    | Control      | NA                | 86                                | Fixed          | 193.90                  |
|              |                  |                            |                                          | 53.1     |                            |             | Simvastatin  | 10mg/day          | 88                                |                | 194.90                  |
|              |                  |                            |                                          | 58.9     |                            |             | Simvastatin  | 20mg/day          | 83                                |                | 194.40                  |

| Study Number | Publication Year | Trial Name             | Mean Age                                              | Follow-up duration (weeks) | Sponsor | Treatment   | Dose of treatment | Number of participants randomized | Dosing Regimen | LDL at baseline (mg/dL) |        |
|--------------|------------------|------------------------|-------------------------------------------------------|----------------------------|---------|-------------|-------------------|-----------------------------------|----------------|-------------------------|--------|
| 152          | 1994             | OCS                    | Secondary Prevention                                  | 63.4                       | 52      | Industry    | Simvastatin       | 40mg/day                          | 206            | Fixed                   | 187.16 |
|              |                  |                        |                                                       |                            |         |             | Simvastatin       | 20mg/day                          | 208            |                         | 187.55 |
|              |                  |                        |                                                       |                            |         |             | Control           | NA                                | 207            |                         | 182.13 |
| 153          | 1994             | CRISP                  | Hypercholesterolemia with or without CHD              | 71.4                       | 48      | Nonindustry | Control           | NA                                | 142            | Fixed                   | 182.40 |
|              |                  |                        |                                                       |                            |         |             | Lovastatin        | 20mg/day                          | 144            |                         | 185.83 |
|              |                  |                        |                                                       |                            |         |             | Lovastatin        | 40mg/day                          | 145            |                         | 180.85 |
| 154          | 2000             | Paolisso et al 2000    | Primary Prevention in Diabetes                        | 67.1                       | 8       | Nonindustry | Control           | NA                                | 67             | Fixed                   | 253.67 |
|              |                  |                        |                                                       |                            |         |             | Simvastatin       | 10mg/day                          | 61             |                         | 252.90 |
|              |                  |                        |                                                       |                            |         |             | Atorvastatin      | 5mg/day                           | 67             |                         | 253.29 |
| 155          | 2000             | Stein et al. 2000      | Mixed Hyperlipidemia and Diabetes with or without CHD | 53.0                       | 6       | Industry    | Control           | NA                                | 130            | Fixed                   | 156.00 |
|              |                  |                        |                                                       |                            |         |             | Simvastatin       | 40mg/day                          | 130            |                         | 156.00 |
|              |                  |                        |                                                       |                            |         |             | Simvastatin       | 80mg/day                          | 130            |                         | 156.00 |
| 156          | 2008             | Voora et al. 2008      | Primary Prevention                                    | 56.3                       | 16      | Industry    | Atorvastatin      | Started at 10mg/day               | 168            | Titration*              | 171.00 |
|              |                  |                        |                                                       |                            |         |             | Simvastatin       | Started at 20mg/day               | 182            |                         | 174.00 |
|              |                  |                        |                                                       |                            |         |             | Pravastatin       | Started at 10mg/day               | 159            |                         | 173.00 |
| 157          | 2003             | Mohler et al. 2003     | Peripheral Arterial Disease                           | 69.0                       | 52      | Industry    | Atorvastatin      | 10mg/day                          | 120            | Fixed                   | 125.00 |
|              |                  |                        |                                                       |                            |         |             | Atorvastatin      | 80mg/day                          | 120            |                         | 125.00 |
|              |                  |                        |                                                       |                            |         |             | Control           | NA                                | 114            |                         | 125.00 |
| 158          | 2002             | Olsson et al. 2002     | Hypercholesterolemia with or without CHD              | 56.3                       | 52      | Industry    | Rosuvastatin      | Started at 5mg/day                | 138            | Titration*              | 188.00 |
|              |                  |                        |                                                       |                            |         |             | Rosuvastatin      | Started at 10mg/day               | 134            |                         | 185.90 |
|              |                  |                        |                                                       |                            |         |             | Atorvastatin      | Started at 10mg/day               | 140            |                         | 188.10 |
| 159          | 2009             | Kostapanos et al. 2009 | Primary hypercholesterolemia without CHD              | 51.3                       | 12      | Nonindustry | Rosuvastatin      | 10mg/day                          | 50             | Fixed                   | 211.00 |
|              |                  |                        |                                                       |                            |         |             | Rosuvastatin      | 20mg/day                          | 50             |                         | 216.00 |

| Study Number | Publication Year | Trial Name            |                                          | Mean Age | Follow-up duration (weeks) | Sponsor  | Treatment    | Dose of treatment   | Number of participants randomized | Dosing Regimen | LDL at baseline (mg/dL) |
|--------------|------------------|-----------------------|------------------------------------------|----------|----------------------------|----------|--------------|---------------------|-----------------------------------|----------------|-------------------------|
|              |                  |                       |                                          | 51.7     |                            |          | Control      | NA                  | 50                                |                | 211.00                  |
| 160          | 2007             | SOLAR                 | Hypercholesterolemia with or without CHD | 63.0     | 12                         | Industry | Rosuvastatin | 10mg/day            | 542                               | Titration*     | 170.00                  |
|              |                  |                       |                                          | 62.3     |                            |          | Atorvastatin | 10mg/day            | 544                               |                | 167.00                  |
|              |                  |                       |                                          | 61.9     |                            |          | Simvastatin  | 20mg/day            | 546                               |                | 167.00                  |
| 161          | 2004             | Schwartz et al. 2004  | Secondary Prevention                     | 62.0     | 24                         | Industry | Rosuvastatin | Started at 5mg/day  | 127                               | Titration*     | 188.00                  |
|              |                  |                       |                                          | 62.0     |                            |          | Rosuvastatin | Started at 10mg/day | 128                               |                | 186.00                  |
|              |                  |                       |                                          | 62.0     |                            |          | Atorvastatin | Started at 10mg/day | 128                               |                | 188.00                  |
| 162          | 2005             | COMETS                | Metabolic Syndrome                       | 58.1     | 12                         | Industry | Rosuvastatin | 10mg/day            | 165                               | Titration*     | 170.15                  |
|              |                  |                       |                                          | 57.3     |                            |          | Atorvastatin | 10mg/day            | 157                               |                | 168.21                  |
|              |                  |                       |                                          | 57.8     |                            |          | Control      | NA                  | 79                                |                | 170.92                  |
| 163          | 2009             | VYMET                 | Metabolic Syndrome                       | 60.0     | 6                          | Industry | Atorvastatin | 10mg/day            | 229                               | Fixed          | 142.00                  |
|              |                  |                       |                                          | 58.0     |                            |          | Atorvastatin | 20mg/day            | 229                               |                | 139.00                  |
|              |                  |                       |                                          | 60.0     |                            |          | Atorvastatin | 40mg/day            | 228                               |                | 140.00                  |
| 164          | 2009             | Rosenson et al. 2009  | Metabolic Syndrome                       | 58.6     | 6                          | Industry | Rosuvastatin | 10mg/day            | 136                               | Fixed          | 166.28                  |
|              |                  |                       |                                          | 58.2     |                            |          | Atorvastatin | 10mg/day            | 119                               |                | 170.15                  |
|              |                  |                       |                                          | 58.5     |                            |          | Control      | NA                  | 63                                |                | 170.15                  |
| 165          | 2005             | DISCOVERY Netherlands | Hypercholesterolemia with or without CHD | 61.0     | 12                         | Industry | Rosuvastatin | 10mg/day            | 621                               | Fixed          | 172.47                  |
|              |                  |                       |                                          | 62.0     |                            |          | Atorvastatin | 10mg/day            | 189                               |                | 168.21                  |
|              |                  |                       |                                          | 62.0     |                            |          | Simvastatin  | 20mg/day            | 194                               |                | 171.31                  |
|              |                  |                       |                                          | 60.0     |                            |          | Pravastatin  | 40mg/day            | 211                               |                | 170.92                  |
| 166          | 1998             | Brown et al. 1998     | Secondary Prevention                     | 62.0     | 54                         | Industry | Atorvastatin | Started at 10mg/day | 78                                | Titration*     | 173.00                  |
|              |                  |                       |                                          | 62.0     |                            |          | Fluvastatin  | Started at 20mg/day | 76                                |                | 170.00                  |
|              |                  |                       |                                          | 64.0     |                            |          | Lovastatin   | Started at 20mg/day | 78                                |                | 175.00                  |

| Study Number | Publication Year | Trial Name              |                                          | Mean Age | Follow-up duration (weeks) | Sponsor     | Treatment    | Dose of treatment   | Number of participants randomized | Dosing Regimen | LDL at baseline (mg/dL) |
|--------------|------------------|-------------------------|------------------------------------------|----------|----------------------------|-------------|--------------|---------------------|-----------------------------------|----------------|-------------------------|
|              |                  |                         |                                          | 63.0     |                            |             | Simvastatin  | Started at 10mg/day | 76                                |                | 172.00                  |
| 167          | 1999             | Crouse et al. 1999      | Hypercholesterolemia with or without CHD | NA       | 12                         | Industry    | Simvastatin  | 40mg/day            | 202                               | Fixed          | 212.70                  |
|              |                  |                         |                                          | NA       |                            |             | Atorvastatin | 20mg/day            | 210                               |                | 212.70                  |
|              |                  |                         |                                          | NA       |                            |             | Simvastatin  | 80mg/day            | 215                               |                | 212.70                  |
|              |                  |                         |                                          | NA       |                            |             | Atorvastatin | 40mg/day            | 215                               |                | 212.70                  |
| 168          | 1990             | Hunninghake et al. 1990 | Hypercholesterolemia with or without CHD | 51.6     | 12                         | Nonindustry | Control      | NA                  | 88                                | Fixed          | 232.60                  |
|              |                  |                         |                                          | 53.5     |                            |             | Pravastatin  | 10mg/day            | 65                                |                | 229.10                  |
|              |                  |                         |                                          | 46.6     |                            |             | Pravastatin  | 20mg/day            | 56                                |                | 245.40                  |
|              |                  |                         |                                          | 52.8     |                            |             | Pravastatin  | 40mg/day            | 59                                |                | 229.00                  |
| 169          | 1994             | FDFS                    | Hypercholesterolemia with or without CHD | 51.5     | 6                          | Nonindustry | Control      | NA                  | 86                                | Fixed          | 251.14                  |
|              |                  |                         |                                          | 48.0     |                            |             | Fluvastatin  | 5mg/day             | 85                                |                | 262.95                  |
|              |                  |                         |                                          | 47.8     |                            |             | Fluvastatin  | 10mg/day            | 85                                |                | 239.75                  |
|              |                  |                         |                                          | 50.9     |                            |             | Fluvastatin  | 20mg/day            | 87                                |                | 243.62                  |
| 170          | 2000             | Recto et al. 2000       | Hypercholesterolemia with or without CHD | NA       | 6                          | Industry    | Simvastatin  | 20mg/day            | 125                               | Fixed          | 193.40                  |
|              |                  |                         |                                          | NA       |                            |             | Simvastatin  | 40mg/day            | 126                               |                | 193.40                  |
|              |                  |                         |                                          | NA       |                            |             | Atorvastatin | 10mg/day            | 125                               |                | 193.40                  |
|              |                  |                         |                                          | NA       |                            |             | Atorvastatin | 20mg/day            | 126                               |                | 193.40                  |
| 171          | 2002             | Brown et al. 2002       | Hypercholesterolemia with or without CHD | 57.2     | 52                         | Industry    | Rosuvastatin | Started on 5mg/day  | 123                               | Titration*     | 187.30                  |
|              |                  |                         |                                          | 58.4     |                            |             | Rosuvastatin | Started on 10mg/day | 116                               |                | 187.00                  |
|              |                  |                         |                                          | 60.0     |                            |             | Pravastatin  | Started on 20mg/day | 118                               |                | 188.50                  |
|              |                  |                         |                                          | 59.4     |                            |             | Simvastatin  | Started on 20mg/day | 120                               |                | 188.00                  |
| 172          | 2002             | Davidson et al. 2002    | Hypercholesterolemia with or without CHD | 56.6     | 12                         | Industry    | Control      | NA                  | 132                               | Fixed          | 187.00                  |
|              |                  |                         |                                          | 57.9     |                            |             | Rosuvastatin | 5mg/day             | 129                               |                | 188.00                  |
|              |                  |                         |                                          | 57.2     |                            |             | Rosuvastatin | 10mg/day            | 130                               |                | 185.00                  |



| Study Number | Publication Year | Trial Name             |                                                                 | Mean Age | Follow-up duration (weeks) | Sponsor  | Treatment    | Dose of treatment   | Number of participants randomized | Dosing Regimen | LDL at baseline (mg/dL) |
|--------------|------------------|------------------------|-----------------------------------------------------------------|----------|----------------------------|----------|--------------|---------------------|-----------------------------------|----------------|-------------------------|
|              |                  |                        |                                                                 | 56.4     |                            |          | Atorvastatin | 10mg/day            | 128                               |                | 186.00                  |
| 173          | 2002             | CHALLENGE              | Hypercholesterolemia with or without CHD                        | 61.7     | 6                          | Industry | Atorvastatin | 10mg/day            | 639                               | Fixed          | 180.00                  |
|              |                  |                        |                                                                 | 61.5     |                            |          | Atorvastatin | 80mg/day            | 207                               |                | 182.00                  |
|              |                  |                        |                                                                 | 61.3     |                            |          | Simvastatin  | 20mg/day            | 641                               |                | 179.00                  |
|              |                  |                        |                                                                 | 61.5     |                            |          | Simvastatin  | 80mg/day            | 207                               |                | 178.00                  |
| 174          | 2001             | Paoletti et al. 2001   | Hypercholesterolemia with or without CHD                        | 58.5     | 12                         | Industry | Rosuvastatin | 5mg/day             | 119                               | Fixed          | 190.00                  |
|              |                  |                        |                                                                 | 58.5     |                            |          | Rosuvastatin | 10mg/day            | 111                               |                | 186.00                  |
|              |                  |                        |                                                                 | 58.5     |                            |          | Pravastatin  | 20mg/day            | 136                               |                | 189.00                  |
|              |                  |                        |                                                                 | 58.5     |                            |          | Simvastatin  | 20mg/day            | 129                               |                | 188.00                  |
| 175          | 2007             | IRIS                   | Hypercholesterolemia with or without CHD                        | 56.8     | 6                          | Industry | Rosuvastatin | 10mg/day            | 189                               | Fixed          | 157.00                  |
|              |                  |                        |                                                                 | 55.6     |                            |          | Rosuvastatin | 20mg/day            | 182                               |                | 153.00                  |
|              |                  |                        |                                                                 | 55.8     |                            |          | Atorvastatin | 10mg/day            | 185                               |                | 159.00                  |
|              |                  |                        |                                                                 | 55.2     |                            |          | Atorvastatin | 20mg/day            | 184                               |                | 156.00                  |
| 176          | 2006             | ARIES                  | Familial hypercholesterolemia and combined hyperlipoproteinemia | 55.0     | 6                          | Industry | Rosuvastatin | 10mg/day            | 195                               | Fixed          | 191.80                  |
|              |                  |                        |                                                                 | 55.4     |                            |          | Rosuvastatin | 20mg/day            | 196                               |                | 189.60                  |
|              |                  |                        |                                                                 | 54.9     |                            |          | Atorvastatin | 10mg/day            | 191                               |                | 189.10                  |
|              |                  |                        |                                                                 | 54.9     |                            |          | Atorvastatin | 20mg/day            | 192                               |                | 191.90                  |
| 177          | 2006             | STARSHIP               | Hypercholesterolemia with or without CHD                        | 58.0     | 6                          | Industry | Rosuvastatin | 10mg/day            | 184                               | Fixed          | 165.00                  |
|              |                  |                        |                                                                 | 57.8     |                            |          | Rosuvastatin | 20mg/day            | 173                               |                | 159.00                  |
|              |                  |                        |                                                                 | 56.7     |                            |          | Atorvastatin | 10mg/day            | 168                               |                | 164.00                  |
|              |                  |                        |                                                                 | 59.0     |                            |          | Atorvastatin | 20mg/day            | 171                               |                | 165.00                  |
| 178          | 2001             | Ballantyne et al. 2001 | Hypercholesterolemia with or without CHD                        | 61.0     | 54                         | Industry | Atorvastatin | Started at 10mg/day | 1902                              | Titration*     | 179.00                  |
|              |                  |                        |                                                                 | 61.0     |                            |          | Fluvastatin  | Started at 20mg/day | 477                               |                | 179.00                  |
|              |                  |                        |                                                                 | 62.0     |                            |          | Lovastatin   | Started at 20mg/day | 476                               |                | 178.00                  |

| Study Number | Publication Year | Trial Name           |                                          | Mean Age | Follow-up duration (weeks) | Sponsor     | Treatment    | Dose of treatment   | Number of participants randomized | Dosing Regimen | LDL at baseline (mg/dL) |
|--------------|------------------|----------------------|------------------------------------------|----------|----------------------------|-------------|--------------|---------------------|-----------------------------------|----------------|-------------------------|
|              |                  |                      |                                          | 61.0     |                            |             | Pravastatin  | Started at 10mg/day | 462                               |                | 179.00                  |
|              |                  |                      |                                          | 61.0     |                            |             | Simvastatin  | Started at 10mg/day | 468                               |                | 176.00                  |
| 179          | 2000             | Gentile et al. 2000  | Primary Prevention in Diabetes           | 59.0     | 24                         | Nonindustry | Atorvastatin | 10mg/day            | 84                                | Fixed          | 213.00                  |
|              |                  |                      |                                          | 58.0     |                            |             | Simvastatin  | 10mg/day            | 78                                |                | 199.00                  |
|              |                  |                      |                                          | 59.0     |                            |             | Pravastatin  | 20mg/day            | 81                                |                | 208.00                  |
|              |                  |                      |                                          | 58.0     |                            |             | Lovastatin   | 20mg/day            | 80                                |                | 210.00                  |
|              |                  |                      |                                          | 61.0     |                            |             | Control      | NA                  | 86                                |                | 218.00                  |
| 180          | 2003             | Davidson et al. 2003 | Primary Hypercholesterolemia             | 58.4     | 6                          | Industry    | Lovastatin   | 10mg/day            | 167                               | Fixed          | 181.75                  |
|              |                  |                      |                                          | 58.2     |                            |             | Lovastatin   | 20mg/day            | 164                               |                | 189.48                  |
|              |                  |                      |                                          | 58.5     |                            |             | Lovastatin   | 40mg/day            | 170                               |                | 189.48                  |
|              |                  |                      |                                          | 58.4     |                            |             | Fluvastatin  | 20mg/day            | 170                               |                | 189.48                  |
|              |                  |                      |                                          | 58.9     |                            |             | Fluvastatin  | 40mg/day            | 167                               |                | 185.75                  |
| 181          | 2006             | MERCURY II           | Hypercholesterolemia with or without CHD | 61.9     | 16                         | Industry    | Rosuvastatin | 20mg/day            | 392                               | Fixed          | 167.10                  |
|              |                  |                      |                                          | 61.9     |                            |             | Atorvastatin | 10mg/day            | 403                               |                | 169.00                  |
|              |                  |                      |                                          | 61.9     |                            |             | Atorvastatin | 20mg/day            | 395                               |                | 168.10                  |
|              |                  |                      |                                          | 61.9     |                            |             | Simvastatin  | 20mg/day            | 402                               |                | 169.40                  |
|              |                  |                      |                                          | 61.9     |                            |             | Simvastatin  | 40mg/day            | 401                               |                | 168.80                  |
| 182          | 2005             | MERCURY I            | Hypercholesterolemia with or without CHD | 62.0     | 8                          | Industry    | Rosuvastatin | 10mg/day            | 538                               | Fixed          | 164.90                  |
|              |                  |                      |                                          | 61.8     |                            |             | Atorvastatin | 10mg/day            | 529                               |                | 162.70                  |
|              |                  |                      |                                          | 62.2     |                            |             | Atorvastatin | 20mg/day            | 925                               |                | 166.70                  |
|              |                  |                      |                                          | 61.9     |                            |             | Simvastatin  | 20mg/day            | 543                               |                | 165.10                  |
|              |                  |                      |                                          | 62.7     |                            |             | Pravastatin  | 40mg/day            | 521                               |                | 164.30                  |
| 183          | 2003             | STELLAR              | Primary Prevention                       | 58.0     | 6                          | Industry    | Rosuvastatin | 10mg/day            | 158                               | Fixed          | 188.00                  |
|              |                  |                      |                                          | 58.0     |                            |             | Rosuvastatin | 20mg/day            | 164                               |                | 187.00                  |

| Study Number | Publication Year | Trial Name | Mean Age | Follow-up duration (weeks) | Sponsor | Treatment    | Dose of treatment | Number of participants randomized | Dosing Regimen | LDL at baseline (mg/dL) |
|--------------|------------------|------------|----------|----------------------------|---------|--------------|-------------------|-----------------------------------|----------------|-------------------------|
|              |                  |            | 58.0     |                            |         | Rosuvastatin | 40mg/day          | 158                               |                | 194.00                  |
|              |                  |            | 58.0     |                            |         | Atorvastatin | 10mg/day          | 158                               |                | 189.00                  |
|              |                  |            | 58.0     |                            |         | Atorvastatin | 20mg/day          | 156                               |                | 190.00                  |
|              |                  |            | 58.0     |                            |         | Atorvastatin | 40mg/day          | 160                               |                | 189.00                  |
|              |                  |            | 58.0     |                            |         | Atorvastatin | 80mg/day          | 167                               |                | 190.00                  |
|              |                  |            | 58.0     |                            |         | Simvastatin  | 10mg/day          | 167                               |                | 189.00                  |
|              |                  |            | 58.0     |                            |         | Simvastatin  | 20mg/day          | 164                               |                | 189.00                  |
|              |                  |            | 58.0     |                            |         | Simvastatin  | 40mg/day          | 159                               |                | 187.00                  |
|              |                  |            | 58.0     |                            |         | Simvastatin  | 80mg/day          | 165                               |                | 190.00                  |
|              |                  |            | 58.0     |                            |         | Pravastatin  | 10mg/day          | 162                               |                | 189.00                  |
|              |                  |            | 58.0     |                            |         | Pravastatin  | 20mg/day          | 166                               |                | 187.00                  |
|              |                  |            | 58.0     |                            |         | Pravastatin  | 40mg/day          | 164                               |                | 190.00                  |

**CHD:** coronary heart disease; **LDL:** low-density lipoprotein

**Industry\*:** Industry-sponsored trials included a statement suggesting that the funding body had no involvement in trial design, conduct, analysis or reporting

**Nonindustry\*:** Despite some industry funding, these studies were considered as nonindustry-sponsored. In the case of MRC/BHF Heart Protection Study, the UK Medical Research Council and British Heart Foundation predominantly provided funding. In the case of GISSI Prevenzione, a pool of financial grants was assured by the companies, which were the owners and the suppliers of the study drugs (no single sponsoring company).

**Titration\*:** For titration trials, results are reported for the fixed dosing period

**Titration\*\*:** For titration trials, results are reported for the final follow up period if all patients were force titrated and received the same dosing strategy for the same duration of time

**Table 2 – Availability of statin-dose comparisons in industry and nonindustry-funded trials.**

|    | <b>Unique comparisons available in nonindustry-sponsored trials</b> | <b>Availability in industry-sponsored trials</b> |
|----|---------------------------------------------------------------------|--------------------------------------------------|
| 1  | Atorvastatin 10 mg/day vs. placebo                                  | Yes                                              |
| 2  | Atorvastatin 10 mg/day vs. atorvastatin 80 mg/day                   | Yes                                              |
| 3  | Atorvastatin 10 mg/day vs. lovastatin 20 mg/day                     | Yes                                              |
| 4  | Atorvastatin 10 mg/day vs. pravastatin 20 mg/day                    | Yes                                              |
| 5  | Atorvastatin 10 mg/day vs. rosuvastatin 5 mg/day                    | Yes                                              |
| 6  | Atorvastatin 10 mg/day vs. simvastatin 10 mg/day                    | Yes                                              |
| 7  | Atorvastatin 10 mg/day vs. simvastatin 20 mg/day                    | Yes                                              |
| 8  | Atorvastatin 20 mg/day vs. placebo                                  | No                                               |
| 9  | Atorvastatin 20 mg/day vs. atorvastatin 80 mg/day                   | Yes                                              |
| 10 | Atorvastatin 20 mg/day vs. rosuvastatin 10 mg/day                   | Yes                                              |
| 11 | Atorvastatin 40 mg/day vs. simvastatin 40 mg/day                    | Yes                                              |
| 12 | Atorvastatin 40 mg/day vs. rosuvastatin 20 mg/day                   | Yes                                              |
| 13 | Atorvastatin 80 mg/day vs. pravastatin 40 mg/day                    | Yes                                              |
| 14 | Fluvastatin 10 mg/day vs. placebo                                   | No                                               |
| 15 | Fluvastatin 10 mg/day vs. fluvastatin 20 mg/day                     | No                                               |
| 16 | Fluvastatin 20 mg/day vs. placebo                                   | Yes                                              |
| 17 | Lovastatin 20 mg/day vs. placebo                                    | Yes                                              |
| 18 | Lovastatin 20 mg/day vs. lovastatin 40 mg/day                       | Yes                                              |
| 19 | Lovastatin 20 mg/day vs. pravastatin 20 mg/day                      | No                                               |
| 20 | Lovastatin 20 mg/day vs. simvastatin 10 mg/day                      | Yes                                              |
| 21 | Lovastatin 40 mg/day vs. placebo                                    | No                                               |
| 22 | Pravastatin 10 mg/day vs. placebo                                   | Yes                                              |
| 23 | Pravastatin 10 mg/day vs. pravastatin 20 mg/day                     | Yes                                              |
| 24 | Pravastatin 10 mg/day vs. pravastatin 40 mg/day                     | Yes                                              |
| 25 | Pravastatin 20 mg/day vs. placebo                                   | Yes                                              |
| 26 | Pravastatin 20 mg/day vs. pravastatin 40 mg/day                     | Yes                                              |
| 27 | Pravastatin 20 mg/day vs. simvastatin 10 mg/day                     | Yes                                              |
| 28 | Pravastatin 40 mg/day vs. placebo                                   | Yes                                              |
| 29 | Rosuvastatin 10 mg/day vs. placebo                                  | Yes                                              |
| 30 | Rosuvastatin 10 mg/day vs. simvastatin 20 mg/day                    | Yes                                              |
| 31 | Rosuvastatin 10 mg/day vs. rosuvastatin 20 mg/day                   | Yes                                              |
| 32 | Rosuvastatin 20 mg/day vs. placebo                                  | Yes                                              |
| 33 | Simvastatin 10 mg/day vs. placebo                                   | Yes                                              |
| 34 | Simvastatin 10 mg/day vs. simvastatin 20 mg/day                     | Yes                                              |
| 35 | Simvastatin 20 mg/day vs. simvastatin 40 mg/day                     | Yes                                              |
| 36 | Simvastatin 40 mg/day vs. placebo                                   | Yes                                              |
